# Supplementary material for: Quality of Outpatient Depression Treatment in Patients With Comorbid Substance Use Disorder
Source: Atypon-hosted journal article supplement (doi:10.1176/appi.ajp.2020.20040454), 2020-10-29
Supplement: appi.ajp.2020.20040454.ds001.pdf [file appi.ajp.2020.20040454.ds001.pdf]

Data supplement for Coughlin et al., Quality of Outpatient Depression Treatment in Patients With Comorbid Substance Use Disorder. Am J Psychiatry (doi: 10.1176/appi.ajp.2020.20040454)

## Appendix 1

**Included antidepressant medications:** amitriptyline, amoxapine, bupropion, citalopram, clomipramine, desvenlafaxine, desipramine, doxepin, duloxetine, escitalopram, fluoxetine, fluvoxamine, imipramine, isocarboxazid, maprotiline, mirtazapine, nefazodone, nortriptyline, paroxetine, phenelzine, protriptyline, sertraline, tranylcypromine, trimipramine, venlafaxine, selegiline, vilazodone, levomilnacipran, vortioxetine

**Psychotherapy CPT codes:** 90804, 90805, 90806, 90807, 90808, 90809, 90810, 90811, 90812, 90813, 90814, 90815, 90816, 90817, 90818, 90819, 90821, 90822, 90823, 90824, 90826, 90827, 90828, 90829, 90832, 90833, 90834, 90836, 90837, 90838, 90839, 90840, 90845, 90846, 90847, 90849, 90853

**TABLE S1. Model-adjusted depression treatment across specific substance use disorders<sup>a</sup>**

| Variable                                | Antidepressant         |            |                               |            | Psychotherapy for Depression |            |                               |            |
|-----------------------------------------|------------------------|------------|-------------------------------|------------|------------------------------|------------|-------------------------------|------------|
|                                         | Acute Phase (N=27,813) |            | Continuation Phase (N=27,813) |            | Acute Phase (N=52,455)       |            | Continuation Phase (N=18,318) |            |
|                                         | Adjusted Odds Ratio    | 95% CI     | Adjusted Odds Ratio           | 95% CI     | Adjusted Odds Ratio          | 95% CI     | Adjusted Odds Ratio           | 95% CI     |
| Alcohol use disorder                    | 0.87***                | 0.80, 0.94 | 0.81***                       | 0.75, 0.88 | 0.86***                      | 0.81, 0.91 | 0.81***                       | 0.72, 0.90 |
| Opioid use disorder                     | 0.74*                  | 0.57, 0.95 | 0.79                          | 0.61, 1.03 | 0.96                         | 0.78, 1.17 | 0.93                          | 0.64, 1.35 |
| Cannabis use disorder                   | 0.81**                 | 0.70, 0.94 | 0.74***                       | 0.63, 0.87 | 1.14*                        | 1.01, 1.27 | 0.93                          | 0.76, 1.13 |
| Cocaine or other stimulant use disorder | 0.81                   | 0.66, 1.01 | 0.82                          | 0.65, 1.03 | 0.78**                       | 0.66, 0.92 | 0.98                          | 0.72, 1.33 |
| Other substance use disorder            | 0.84                   | 0.63, 1.12 | 0.88                          | 0.66, 1.19 | 0.71**                       | 0.56, 0.89 | 1.28                          | 0.85, 1.93 |
| Age ≥65 (ref: 18–64 years)              | 0.97                   | 0.90, 1.04 | 1.03                          | 0.96, 1.11 | 0.75***                      | 0.71, 0.79 | 0.94                          | 0.86, 1.03 |
| Gender (ref: male)                      | 1.14***                | 1.06, 1.21 | 1.12***                       | 1.05, 1.19 | 1.08**                       | 1.02, 1.13 | 1.20***                       | 1.11, 1.30 |
| Race (ref: White)                       |                        |            |                               |            |                              |            |                               |            |
| American Indian/Alaskan Native          | 0.74*                  | 0.57, 0.95 | 0.87                          | 0.67, 1.11 | 0.90                         | 0.74, 1.09 | 0.98                          | 0.70, 1.37 |
| Asian/Pacific Islander/ Native Hawaiian | 0.89                   | 0.76, 1.05 | 0.85*                         | 0.73, 0.99 | 1.02                         | 0.91, 1.14 | 1.01                          | 0.83, 1.22 |
| Black                                   | 0.53***                | 0.50, 0.56 | 0.50***                       | 0.47, 0.53 | 1.09***                      | 1.04, 1.14 | 0.86***                       | 0.80, 0.93 |
| Multiracial                             | 0.71**                 | 0.58, 0.89 | 0.82                          | 0.66, 1.01 | 1.16                         | 0.98, 1.36 | 0.88                          | 0.66, 1.16 |
| Unknown                                 | 0.79***                | 0.71, 0.88 | 0.69***                       | 0.63, 0.77 | 0.84***                      | 0.77, 0.90 | 0.89                          | 0.78, 1.02 |
| Hispanic                                | 0.74***                | 0.68, 0.80 | 0.78***                       | 0.72, 0.85 | 1.10**                       | 1.03, 1.17 | 0.89*                         | 0.79–0.99  |
| Elixhauser score                        |                        |            |                               |            |                              |            |                               |            |
| 1 vs. 0 comorbidities                   | 1.10**                 | 1.03, 1.17 | 1.15***                       | 1.08, 1.22 | 0.91***                      | 0.87, 0.95 | 0.98                          | 0.91, 1.06 |
| 2 vs. 0 comorbidities                   | 1.09*                  | 1.00, 1.18 | 1.16***                       | 1.07, 1.25 | 0.98                         | 0.93, 1.04 | 1.08                          | 0.98, 1.18 |
| ≥3 vs. 0 comorbidities                  | 1.18***                | 1.08, 1.30 | 1.30***                       | 1.19, 1.41 | 0.99                         | 0.93, 1.05 | 0.99                          | 0.89, 1.10 |
| Geographic locality (ref: urban)        | 1.10**                 | 1.03, 1.17 | 1.10**                        | 1.04, 1.17 | 0.99                         | 0.95, 1.03 | 1.01                          | 0.94, 1.10 |
| Service-connected disability            | 1.03                   | 0.97, 1.08 | 1.03                          | 0.98, 1.09 | 1.00                         | 0.97, 1.04 | 1.06                          | 0.99, 1.13 |
| Homeless                                | 0.76***                | 0.68, 0.84 | 0.69***                       | 0.62, 0.78 | 1.06                         | 0.98, 1.15 | 0.92                          | 0.80–1.06  |
| PTSD                                    | 0.98                   | 0.93, 1.04 | 1.01                          | 0.95, 1.07 | 0.47***                      | 0.45, 0.50 | 0.77***                       | 0.70–0.84  |
| Anxiety disorder                        | 1.02                   | 0.97, 1.08 | 1.07*                         | 1.01, 1.13 | 0.97                         | 0.93, 1.01 | 0.81***                       | 0.75, 0.87 |
| Facility                                |                        |            |                               |            |                              |            |                               |            |
| CBOC vs. VAMC                           | 1.19***                | 1.13, 1.25 | 1.16***                       | 1.10, 1.22 | 0.99                         | 0.95, 1.02 | 0.97                          | 0.91, 1.04 |
| Other vs. VAMC                          | 1.05                   | 0.94, 1.17 | 1.07                          | 0.96, 1.19 | 1.17***                      | 1.08, 1.26 | 0.87*                         | 0.76, 1.00 |
| Distance >30 miles (ref: ≤30)           | 1.08*                  | 1.00, 1.16 | 1.01                          | 0.94, 1.08 | 0.81***                      | 0.77, 0.85 | 0.78***                       | 0.71, 0.86 |

<sup>a</sup> Patients were included in the models for adequate acute and continuation phase antidepressant treatment if they received an index antidepressant prescription (N=27,813 with complete data). All participants, after listwise deletion of missing data, were included in the acute phase psychotherapy model (N=52,455 with complete data), which required only a single therapy session. The continuation phase psychotherapy model included only those patients with an index therapy session (N=18,318). PTSD=posttraumatic stress disorder; CBOC=community-based outpatient clinic; VAMC=Veterans Administration Medical Center.

\*p<0.05. \*\*p<0.01. \*\*\*p<0.001.

**TABLE S2. Sensitivity analysis where any psychotherapy sessions, not just depression-specific sessions, were included in model**

| Variable                                | Psychotherapy                |            |                                  |            |
|-----------------------------------------|------------------------------|------------|----------------------------------|------------|
|                                         | Timely Initiation (N=52,455) |            | Adequate Continuation (N=23,850) |            |
|                                         | Adjusted Odds Ratio          | 95% CI     | Adjusted Odds Ratio              | 95% CI     |
| Substance use disorder                  | 1.03                         | 0.98, 1.08 | 0.89**                           | 0.82, 0.96 |
| Age ≥65 (ref=18–64 years)               | 0.76***                      | 0.72, 0.80 | 0.91*                            | 0.84, 0.98 |
| Gender (ref=Male)                       | 1.02                         | 0.97, 1.07 | 1.17***                          | 1.09, 1.26 |
| Race (ref=White)                        |                              |            |                                  |            |
| American Indian/Alaskan Native          | 0.91                         | 0.77, 1.09 | 0.95                             | 0.72, 1.26 |
| Asian/Pacific Islander/ Native Hawaiian | 1.03                         |            |                                  |            |
| Black                                   |                              | 0.92, 1.15 | 0.94                             | 0.79, 1.11 |
| Multi-racial                            | 1.06**                       | 1.02, 1.11 | 0.87***                          | 0.81, 0.93 |
| Unknown                                 | 1.09                         | 0.93, 1.27 | 0.95                             | 0.75, 1.21 |
| Hispanic                                | 0.86***                      | 0.80, 0.93 | 0.87*                            | 0.78, 0.98 |
| Elixhauser score                        | 1.16***                      | 1.10, 1.24 | 0.88**                           | 0.81, 0.97 |
| 1 vs. 0                                 | 0.85***                      | 0.81, 0.89 | 1.00                             | 0.93, 1.07 |
| 2 vs. 0                                 | 0.88***                      | 0.84, 0.93 | 1.08                             | 0.99, 1.17 |
| ≥3 vs. 0                                | 0.89***                      | 0.83, 0.94 | 1.02                             | 0.93, 1.12 |
| Geographic locality (ref=Non-rural)     | 0.98                         | 0.94, 1.02 | 1.04                             | 0.98, 1.12 |
| Service-connected disability            | 1.07***                      | 1.03, 1.11 | 1.05                             | 1.00, 1.12 |
| Homeless                                | 1.02                         | 0.94, 1.11 | 0.91                             | 0.80, 1.02 |
| PTSD                                    | 1.00                         | 0.96, 1.05 | 0.90**                           | 0.85, 0.96 |
| Anxiety disorder                        | 1.34***                      | 1.29, 1.40 | 0.88***                          | 0.83, 0.94 |
| Facility                                |                              |            |                                  |            |
| CBOC vs. VAMC                           | 1.02                         | 0.98, 1.06 | 1.00                             | 0.94, 1.05 |
| Other vs. VAMC                          | 1.16***                      | 1.08, 1.26 | 1.01                             | 0.90, 1.13 |
| Distance >30 miles (ref=≤30)            | 0.81***                      | 0.77, 0.85 | 0.79***                          | 0.73, 0.86 |

<sup>a</sup> All participants, after listwise deletion of missing data, were included in the acute phase psychotherapy model (N=52,455 with complete data), which required one therapy session. The continuation phase psychotherapy model included only those patients with an initial therapy session (N=23,850). CBOC=community-based outpatient clinic; PTSD=post-traumatic stress disorder; VAMC=Veterans Administration Medical Center.

\*p<0.05. \*\*p<0.01. \*\*\*p<0.001.
